# Supplementary material for: Distinct prognosis of biliary tract cancer according to tumor location, stage, and treatment: a population-based study
Source: PubMed Central journal article supplement (PMC9205970; doi:10.1038/s41598-022-13605-3), 2022-06-17

Original article

## **Distinct prognosis of biliary tract cancer according to tumor location, stage, and treatment: a population-based study**

Mee Joo Kang<sup>1,2</sup>, Jiwon Lim<sup>2</sup>, Sung-Sik Han<sup>1</sup>, Hyeong Min Park<sup>1</sup>, Sun-Whe Kim<sup>1</sup>, Woo Jin Lee<sup>1</sup>, Sang Myung Woo<sup>1</sup>, Tae Hyun Kim<sup>1</sup>, Young-Joo Won<sup>2,3,\*</sup>, and Sang-Jae Park<sup>1,\*</sup>

<sup>1</sup> Center for Liver and Pancreatobiliary Cancer, National Cancer Center, Goyang, Korea

<sup>2</sup> Division of Cancer Registration and Surveillance, National Cancer Center, Goyang, Korea

<sup>3</sup> Department of Cancer Control & Population Health, Graduate School of Cancer Science and Policy, National Cancer Center, Goyang, Korea

**\*Correspondence to:**

**Sang-Jae Park, M.D., Ph.D.**

Center for Liver and Pancreatobiliary Cancer, National Cancer Center

323 Ilsan-ro, Ilsandong-gu, Goyang-si Gyeonggi-do, 10408, Republic of Korea

Tel: 82-31-920-1640 E-mail: [spark@ncc.re.kr](mailto:spark@ncc.re.kr)

**Young-Joo Won, Ph.D.**

Korea Central Cancer Registry, National Cancer Center

323 Ilsan-ro, Ilsandong-gu, Goyang-si Gyeonggi-do, 10408, Republic of Korea

Tel: 82-31-920-2015 E-mail: [astra67@ncc.re.kr](mailto:astra67@ncc.re.kr)

**Supplementary figures**

Supplementary figure 1. Gallbladder cancer

Supple Figure 1a. Treatment pattern according to SEER stage and time period

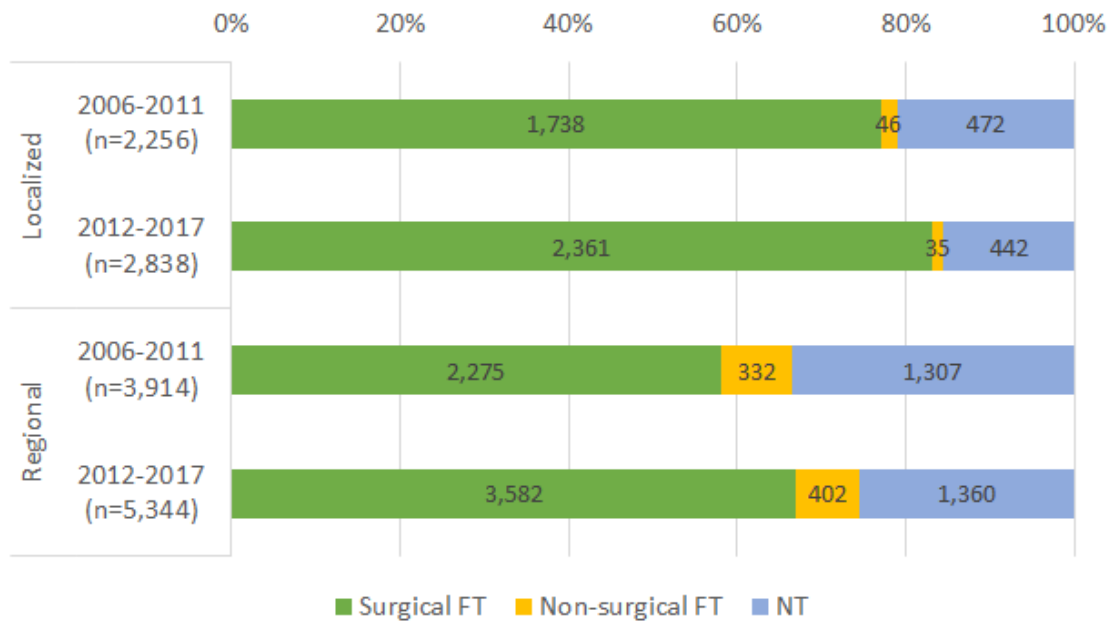

Supple Figure 1b. Five-year relative survival rate according to SEER stage and first course of treatment

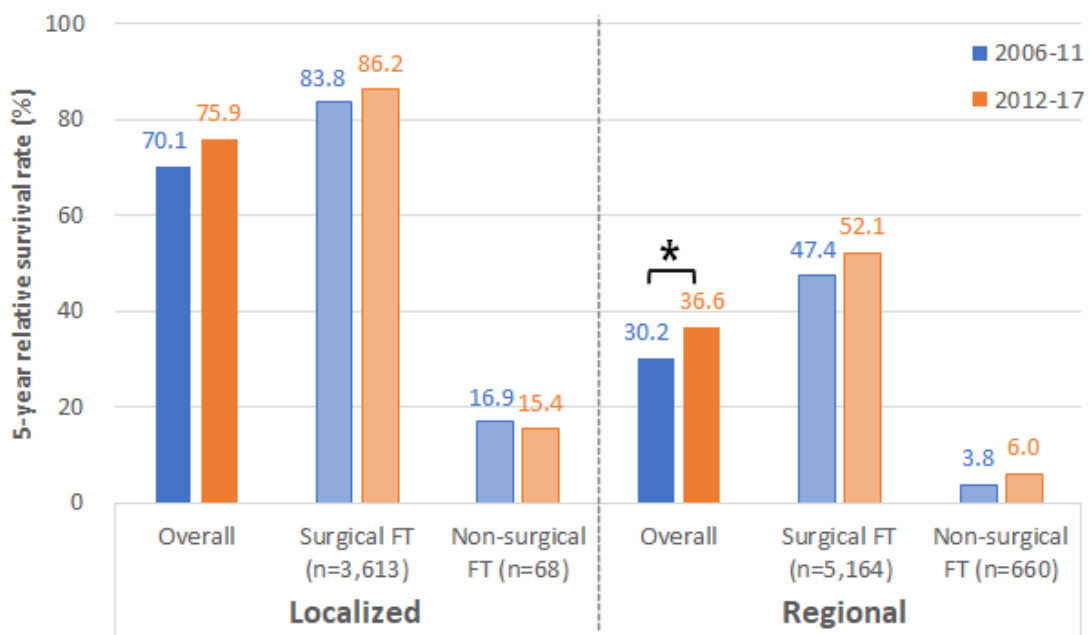

\* is statistically significant with p-value of <0.05.

Supplementary figure 2. Intrahepatic bile duct cancer

Supple Figure 2a. Treatment pattern according to SEER stage and time period

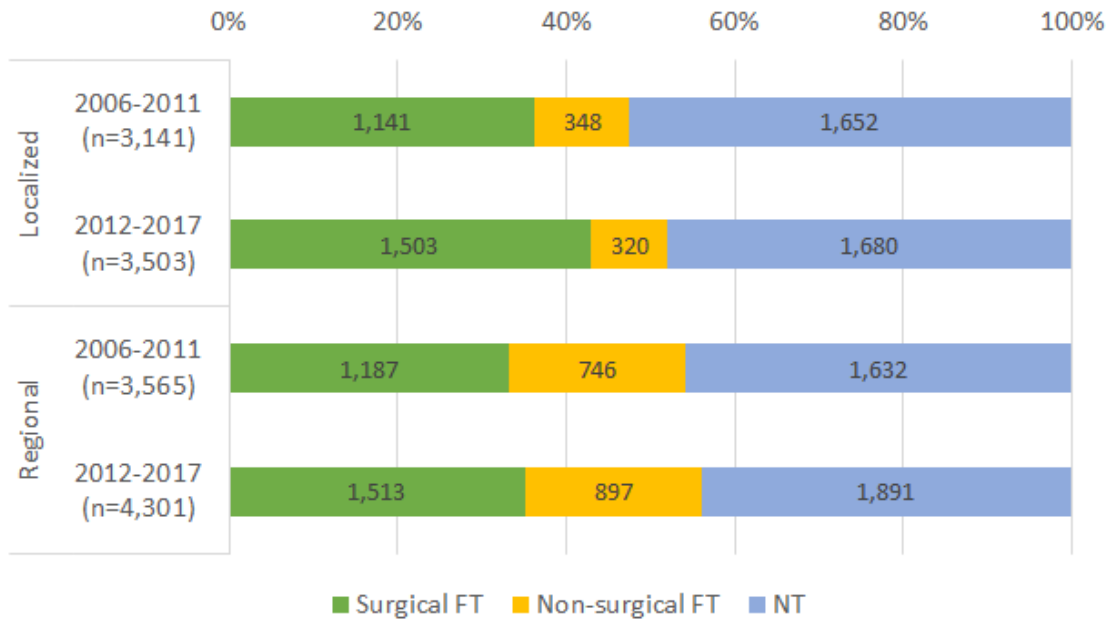

Supple Figure 2b. Five-year relative survival rate according to SEER stage and first course of treatment

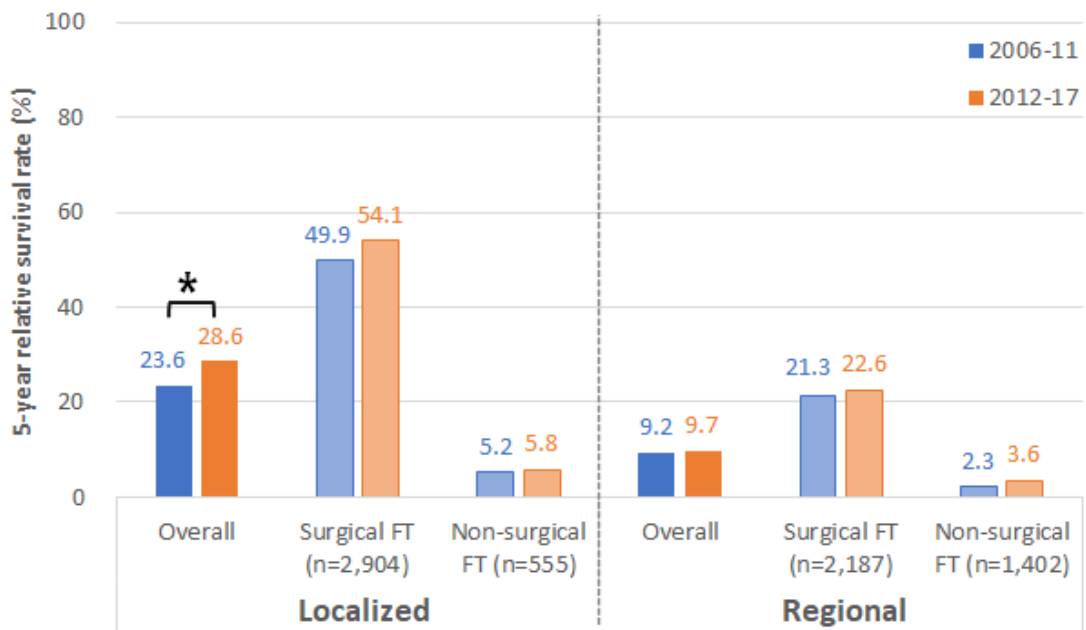

\* is statistically significant with p-value of <0.05.

Supplementary figure 3. Extrahepatic bile duct cancer

Supple Figure 3a. Treatment pattern according to SEER stage and time period

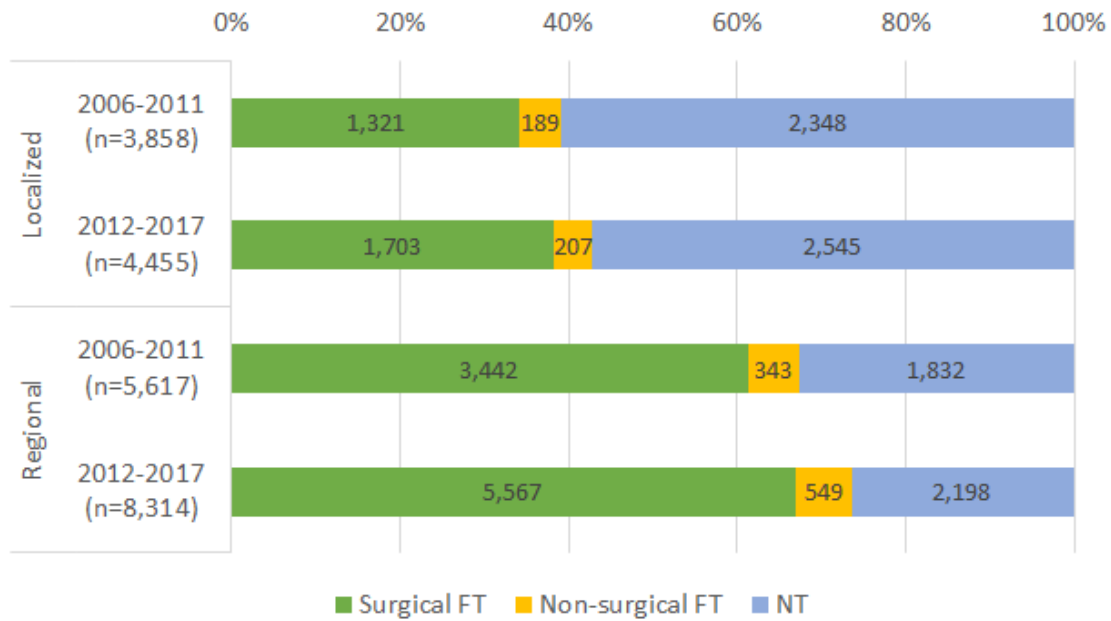

Supple Figure 3b. Five-year relative survival rate according to SEER stage and first course of treatment

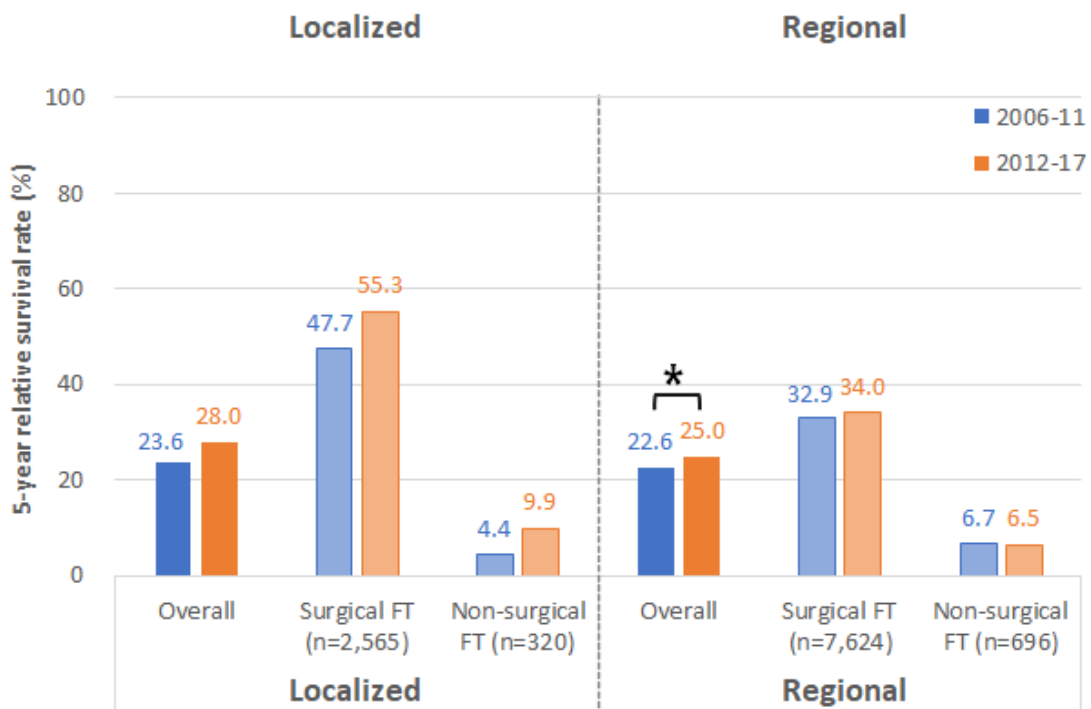

\* is statistically significant with p-value of <0.05.

Supplementary figure 4. Ampulla of Vater cancer

Supple Figure 4a. Treatment pattern according to SEER stage and time period

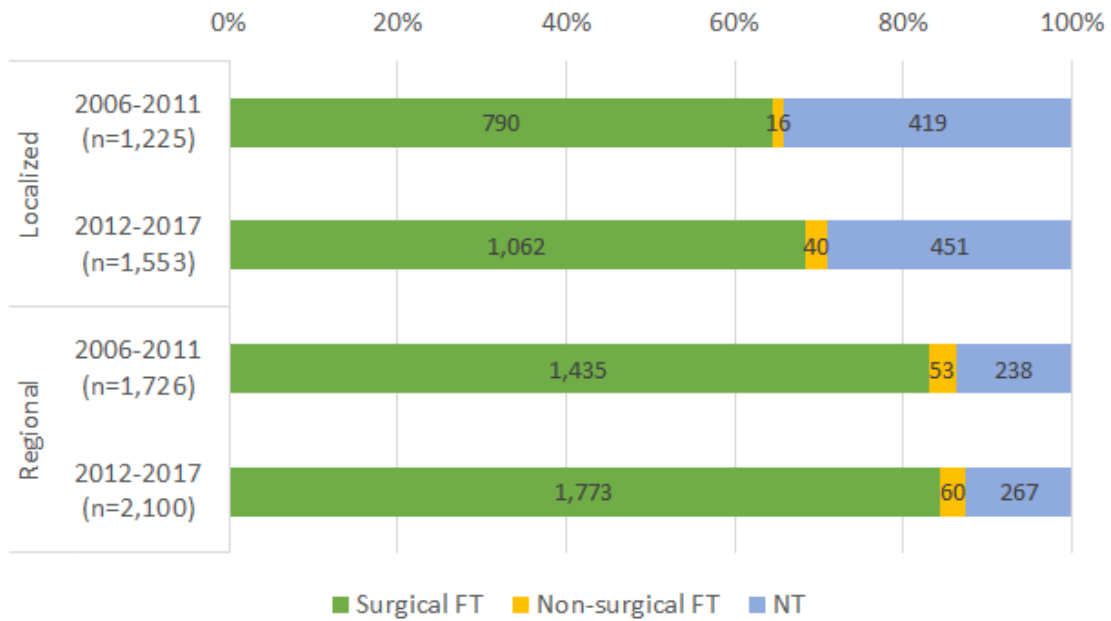

Supple Figure 4b. Five-year relative survival rate according to SEER stage and first course of treatment

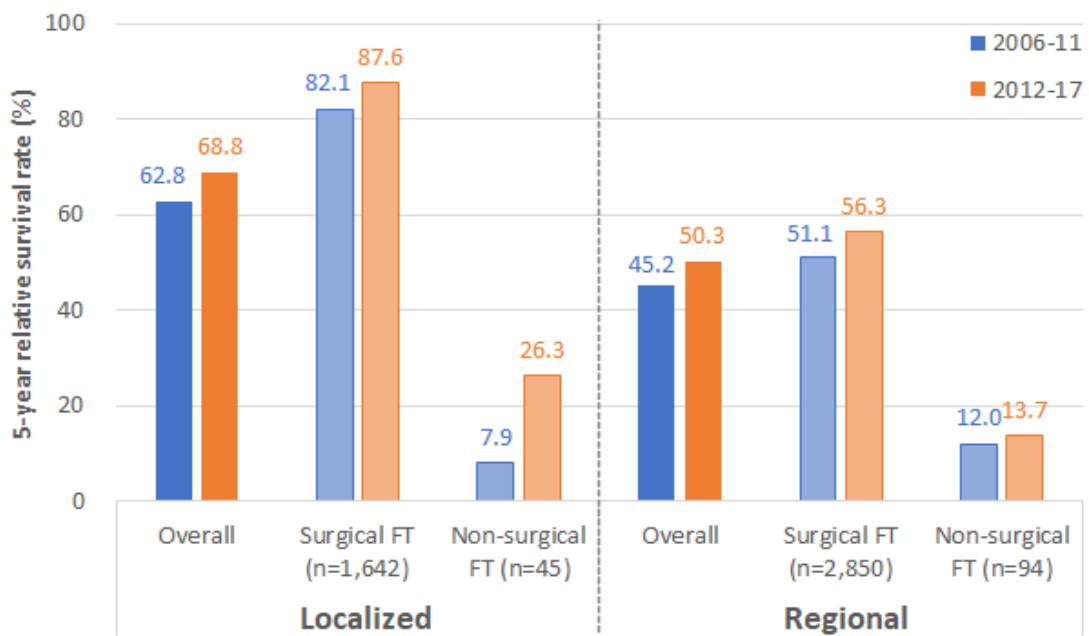

Supplement: 41598_2022_13605_MOESM1_ESM.pdf [file 41598_2022_13605_MOESM1_ESM.pdf]
